# Supplementary material for: How People’s COVID-19 Induced-Worries and Multiple Environmental Exposures Are Associated with Their Depression, Anxiety, and Stress during the Pandemic
Source: MDPI journal article supplement (doi:10.3390/ijerph20166620), 2023-08-21
Supplement: s1 [file s1]

## Supplementary materials

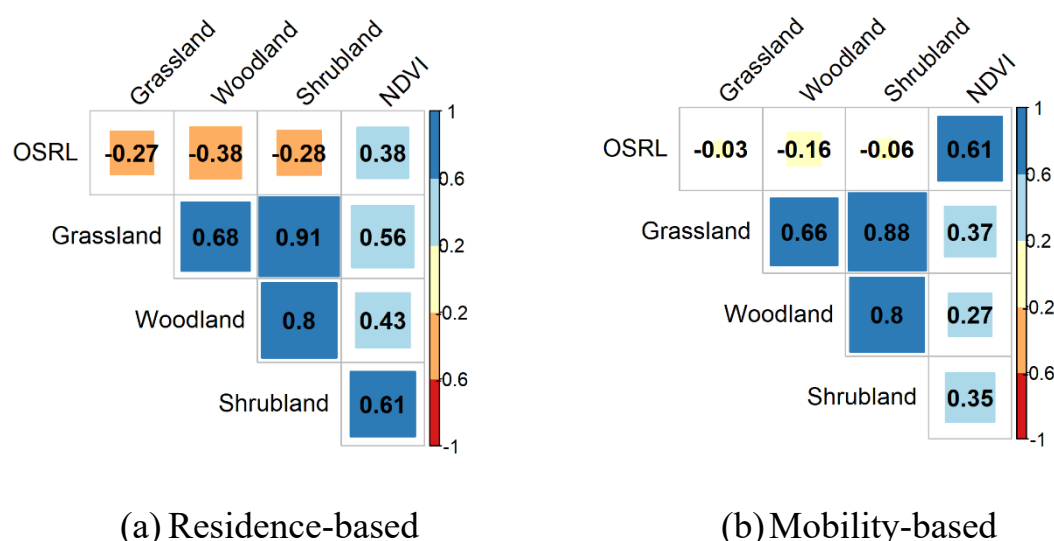

Figure S1. Correlation matrix of (a) residence-based and (b) mobility-based greenspace exposures based on Spearman correlation coefficients. OSRL refers to open space and recreational land.

Table S1. Questions and items about people's depression and anxiety.

| Depression and anxiety questions                                                             | Items                                       | Scales                                          |
|----------------------------------------------------------------------------------------------|---------------------------------------------|-------------------------------------------------|
| Depression and anxiety (PHQ-4):<br>Over the past two weeks, have you been by these problems? | Feeling nervous, anxious, or on edge        | 1 – 6                                           |
|                                                                                              | Not being able to stop or control worrying  | (“1” indicates “never”, “6” indicates “always”) |
|                                                                                              | Feeling down, depressed, or hopeless        |                                                 |
|                                                                                              | Little interest or pleasure in doing things |                                                 |

Table S2. Questions and items about people's stress.

| Stress symptoms questions                                                | Items             | Scales                                          | Factor loading <sup>a</sup> |
|--------------------------------------------------------------------------|-------------------|-------------------------------------------------|-----------------------------|
| Stress:<br>Over the past year, have you been bothered by these problems? | Distress          | 1 – 6                                           | 0.87 *                      |
|                                                                          | Sleep disturbance | (“1” indicates “never”, “6” indicates “always”) | 0.28                        |
|                                                                          | Fatigue           |                                                 | 0.72 *                      |
|                                                                          | Headache          |                                                 | 0.47 *                      |

Notes: <sup>a</sup> Exploratory factor analysis; \* Factor loadings for each scale item indicate onto which subfactor the scale item loaded.

Table S3. Questions and items about people's COVID-19-related worries.

| COVID-19-related worries                                                                                      | Items                                   | Scales                                                                                                        |
|---------------------------------------------------------------------------------------------------------------|-----------------------------------------|---------------------------------------------------------------------------------------------------------------|
| How severe do you think was the transmission of COVID-19 in your residential neighborhood from January 2020?  | Residence-based perceived COVID-19 risk | 1 – 6<br>(“1” indicates “very low transmission risk”, “6” indicates “the transmission of COVID-19 is severe”) |
| How severe do you think was the transmission of COVID-19 in venues or places you usually visited in one week? | Mobility-based perceived COVID-19 risk  |                                                                                                               |
| Over the past year, how has your life been affected by the COVID-19 pandemic?                                 | Worry about job loss                    | 1 – 6                                                                                                         |
|                                                                                                               | Worry about income reduction            | (“1” indicates “never”, “6” indicates “always”)                                                               |
|                                                                                                               | Worry about family conflict             |                                                                                                               |

Table S4. Residence-based and mobility-based greenspace exposures (N=217).

| Variables                            | Category  | Mean | SD   | Factor loading <sup>a</sup> |
|--------------------------------------|-----------|------|------|-----------------------------|
| Residence-based greenspace exposures | Grassland | 0.03 | 0.04 | 0.70 *                      |
|                                      | Woodland  | 0.01 | 0.01 | 0.93 *                      |
|                                      | Shrubland | 0.01 | 0.02 | 0.62 *                      |
|                                      | NDVI      | 0.26 | 0.05 | 0.60 *                      |
| Mobility-based greenspace exposures  | Grassland | 0.03 | 0.04 | 0.68 *                      |
|                                      | Woodland  | 0.01 | 0.01 | 0.82 *                      |
|                                      | Shrubland | 0.01 | 0.01 | 0.63 *                      |
|                                      | NDVI      | 0.26 | 0.05 | 0.46 *                      |

Notes: <sup>a</sup> Exploratory factor analysis; \* Factor loadings for each scale item indicate onto which subfactor the scale item loaded.

Table S5. The performance of the residential-based and mobility-based linear regression models for people's depression across different groups.

| <b>Depression</b>      |                          |                       |                       |                       |
|------------------------|--------------------------|-----------------------|-----------------------|-----------------------|
| <b>Subgroup models</b> | <b>Residential-based</b> |                       | <b>Mobility-based</b> |                       |
|                        | AIC                      | Adjust R <sup>2</sup> | AIC                   | Adjust R <sup>2</sup> |
| SSP                    | 296.81                   | 0.18                  | 294.83                | 0.19                  |
| TSW                    | 325.93                   | 0.13                  | 309.41                | 0.20                  |
| Female                 | 344.91                   | 0.09                  | 343.66                | 0.20                  |
| Male                   | 282.03                   | 0.13                  | 280.04                | 0.14                  |
| Married                | 222.24                   | 0.21                  | 224.13                | 0.22                  |
| Unmarried              | 395.51                   | 0.07                  | 394.41                | 0.12                  |
| Social housing         | 407.50                   | 0.13                  | 404.85                | 0.12                  |
| Private housing        | 208.39                   | 0.14                  | 213.86                | 0.10                  |
| High income            | 152.19                   | 0.29                  | 140.82                | 0.42                  |
| Low income             | 458.74                   | 0.15                  | 441.34                | 0.13                  |

Table S6. The performance of the residential-based and mobility-based linear regression models for people's stress across different groups.

| <b>Stress</b>          |                          |                       |                       |                       |
|------------------------|--------------------------|-----------------------|-----------------------|-----------------------|
| <b>Subgroup models</b> | <b>Residential-based</b> |                       | <b>Mobility-based</b> |                       |
|                        | AIC                      | Adjust R <sup>2</sup> | AIC                   | Adjust R <sup>2</sup> |
| SSP                    | 292.90                   | 0.21                  | 293.20                | 0.24                  |
| TSW                    | 317.49                   | 0.12                  | 311.11                | 0.13                  |
| Female                 | 348.30                   | 0.04                  | 343.42                | 0.09                  |
| Male                   | 274.94                   | 0.20                  | 267.37                | 0.24                  |
| Married                | 230.12                   | 0.13                  | 224.87                | 0.21                  |
| Unmarried              | 384.73                   | 0.13                  | 384.71                | 0.14                  |
| Social housing         | 399.75                   | 0.18                  | 397.12                | 0.17                  |
| Private housing        | 218.15                   | 0.13                  | 216.08                | 0.13                  |
| High income            | 162.68                   | 0.11                  | 160.82                | 0.12                  |
| Low income             | 446.94                   | 0.14                  | 442.72                | 0.18                  |

Table S7. Results of the linear regression models for participants' residential neighborhoods. (N = 217).

| Variables                                              | Depression        |                  |                  |                  | Stress            |                  |                 |                 |
|--------------------------------------------------------|-------------------|------------------|------------------|------------------|-------------------|------------------|-----------------|-----------------|
|                                                        | Residential-based |                  | Mobility-based   |                  | Residential-based |                  | Mobility-based  |                 |
|                                                        | SSP<br>(N=107)    | TSW<br>(N=110)   | SSP<br>(N=107)   | TSW<br>(N=110)   | SSP<br>(N=107)    | TSW<br>(N=110)   | SSP<br>(N=107)  | TSW<br>(N=110)  |
|                                                        | Coef.<br>(SE)     | Coef.<br>(SE)    | Coef.<br>(SE)    | Coef.<br>(SE)    | Coef.<br>(SE)     | Coef.<br>(SE)    | Coef.<br>(SE)   | Coef.<br>(SE)   |
| Greenspace                                             |                   |                  |                  |                  |                   |                  |                 |                 |
| Open Space and<br>Recreational<br>land                 | 0.06<br>(0.10)    | 0.01<br>(0.11)   | 0.07<br>(0.09)   | -0.04<br>(0.11)  | 0.11<br>(0.09)    | -0.03<br>(0.21)  | 0.12<br>(0.10)  | 0.21*<br>(0.10) |
| Greenspace                                             | -0.05<br>(0.09)   | 0.01<br>(0.12)   | -0.10<br>(0.15)  | -0.05<br>(0.106) | -0.13<br>(0.10)   | -0.27<br>(0.15)  | -0.08<br>(0.11) | -0.08<br>(0.09) |
| COVID-19 risk and worries                              |                   |                  |                  |                  |                   |                  |                 |                 |
| Perceived<br>COVID-19 risk                             | 0.21*<br>(0.10)   | 0.14 *<br>(0.09) | 0.19 *<br>(0.11) | 0.21*<br>(0.09)  | 0.07<br>(0.09)    | 0.13<br>(0.10)   | 0.05<br>(0.10)  | 0.19*<br>(0.09) |
| Worry about<br>family conflict                         | 0.24 *<br>(0.11)  | 0.06<br>(0.11)   | 0.25 *<br>(0.10) | 0.02<br>(0.10)   | 0.21*<br>(0.11)   | 0.20 *<br>(0.11) | 0.21*<br>(0.11) | 0.20*<br>(0.11) |
| Worries about<br>financial<br>hardship and<br>job loss | 0.27 *<br>(0.11)  | 0.16*<br>(0.11)  | 0.23*<br>(0.11)  | 0.26*<br>(0.11)  | 0.29**<br>(0.11)  | 0.10<br>(0.11)   | 0.30*<br>(0.12) | 0.09<br>(0.10)  |
| PM <sub>2.5</sub> and noise exposures                  |                   |                  |                  |                  |                   |                  |                 |                 |
| PM <sub>2.5</sub>                                      | -                 | -                | 0.07<br>(0.10)   | 0.15<br>(0.10)   | -                 | -                | 0.02<br>(0.10)  | 0.11<br>(0.10)  |
| Daytime noise                                          | -                 | -                | 0.03<br>(0.10)   | -0.02<br>(0.10)  | -                 | -                | 0.05<br>(0.10)  | 0.03<br>(0.09)  |
| Nighttime noise                                        | -                 | -                | 0.06<br>(0.11)   | 0.07<br>(0.10)   | -                 | -                | -0.11<br>(0.10) | 0.07<br>(0.10)  |

Notes: \*\* denotes  $p < 0.01$ ; \* denotes  $p < 0.05$ . All models control participants' socio-demographic features, which include age, gender, education, employment, marital status, household income, residence neighborhoods, housing type, homeownership, and working place.

Table S8. Results of the linear regression models for participants' gender. (N = 217).

| Variables                                              | Depression        |                  |                   |                  | Stress            |                  |                   |                  |
|--------------------------------------------------------|-------------------|------------------|-------------------|------------------|-------------------|------------------|-------------------|------------------|
|                                                        | Residential-based |                  | Mobility-based    |                  | Residential-based |                  | Mobility-based    |                  |
|                                                        | Female<br>(N=119) | Male<br>(N=98)   | Female<br>(N=119) | Male<br>(N=98)   | Female<br>(N=119) | Male<br>(N=98)   | Female<br>(N=119) | Male<br>(N=98)   |
|                                                        | Coef.<br>(SE)     | Coef.<br>(SE)    | Coef.<br>(SE)     | Coef.<br>(SE)    | Coef.<br>(SE)     | Coef.<br>(SE)    | Coef.<br>(SE)     | Coef.<br>(SE)    |
| Greenspace                                             |                   |                  |                   |                  |                   |                  |                   |                  |
| Open Space and<br>Recreational<br>land                 | 0.01<br>(0.10)    | 0.07<br>(0.11)   | 0.02<br>(0.14)    | -0.06<br>(0.11)  | 0.17<br>(0.10)    | 0.11<br>(0.10)   | 0.24 *<br>(0.09)  | 0.01<br>(0.10)   |
| Greenspace                                             | -0.11<br>(0.09)   | -0.12<br>(0.15)  | -0.11<br>(0.09)   | -0.09<br>(0.10)  | -0.02<br>(0.10)   | -0.17<br>(0.14)  | -0.14<br>(0.09)   | -0.20*<br>(0.10) |
| COVID-19 risk and worries                              |                   |                  |                   |                  |                   |                  |                   |                  |
| Perceived<br>COVID-19 risk                             | 0.08<br>(0.09)    | 0.31**<br>(0.11) | 0.24*<br>(0.09)   | 0.31**<br>(0.10) | 0.14<br>(0.10)    | 0.15<br>(0.10)   | 0.13<br>(0.10)    | 0.25*<br>(0.10)  |
| Worry about<br>family conflict                         | 0.11<br>(0.11)    | 0.05<br>(0.12)   | 0.10<br>(0.10)    | 0.07<br>(0.12)   | 0.19*<br>(0.11)   | 0.22*<br>(0.11)  | 0.19<br>(0.11)    | 0.23*<br>(0.11)  |
| Worries about<br>financial<br>hardship and<br>job loss | 0.26**<br>(0.10)  | 0.22*<br>(0.11)  | 0.27**<br>(0.11)  | 0.22*<br>(0.12)  | 0.08<br>(0.11)    | 0.27**<br>(0.11) | 0.07<br>(0.10)    | 0.26*<br>(0.11)  |
| PM <sub>2.5</sub> and noise exposures                  |                   |                  |                   |                  |                   |                  |                   |                  |
| PM <sub>2.5</sub>                                      | -                 |                  | 0.01<br>(0.09)    | 0.22*<br>(0.11)  | -                 | -                | -0.04<br>(0.09)   | 0.16*<br>(0.10)  |
| Daytime noise                                          | -                 |                  | -0.02<br>(0.09)   | 0.01<br>(0.11)   | -                 | -                | -0.11<br>(0.10)   | -0.06<br>(0.10)  |
| Nighttime noise                                        | -                 |                  | -0.01<br>(0.10)   | 0.11<br>(0.11)   | -                 | -                | 0.14<br>(0.09)    | 0.19*<br>(0.10)  |

Notes: \*\* denotes  $p < 0.01$ ; \* denotes  $p < 0.05$ . All models control participants' socio-demographic features, which include age, gender, education, employment, marital status, household income, residence neighborhoods, housing type, homeownership, and working place.

Table S9. Results of the linear regression models for participants' marital status. (N = 217).

| Variables                                                 | Depression        |                      |                   |                      | Stress            |                      |                   |                      |
|-----------------------------------------------------------|-------------------|----------------------|-------------------|----------------------|-------------------|----------------------|-------------------|----------------------|
|                                                           | Residential-based |                      | Mobility-based    |                      | Residential-based |                      | Mobility-based    |                      |
|                                                           | Married<br>(N=80) | Unmarried<br>(N=137) | Married<br>(N=80) | Unmarried<br>(N=137) | Married<br>(N=80) | Unmarried<br>(N=137) | Married<br>(N=80) | Unmarried<br>(N=137) |
|                                                           | Coef.<br>(SE)     | Coef.<br>(SE)        | Coef.<br>(SE)     | Coef.<br>(SE)        | Coef.<br>(SE)     | Coef.<br>(SE)        | Coef.<br>(SE)     | Coef.<br>(SE)        |
| Greenspace                                                |                   |                      |                   |                      |                   |                      |                   |                      |
| Open Space<br>and<br>Recreational<br>land                 | 0.04<br>(0.09)    | 0.03<br>(0.09)       | 0.06<br>(0.12)    | -0.04<br>(0.09)      | 0.18<br>(0.08)    | 0.18<br>(0.08)       | 0.25*<br>(0.12)   | 0.12<br>(0.08)       |
| Greenspace                                                | -0.13<br>(0.09)   | -0.14<br>(0.09)      | -0.01<br>(0.10)   | -0.08<br>(0.09)      | -0.10<br>(0.08)   | -0.11<br>(0.09)      | -0.05<br>(0.11)   | -0.04 (0.09)         |
| COVID-19 risk and worries                                 |                   |                      |                   |                      |                   |                      |                   |                      |
| Perceived<br>COVID-19<br>risk                             | 0.06<br>(0.11)    | 0.17*<br>(0.09)      | 0.19*<br>(0.11)   | 0.19*<br>(0.08)      | 0.07<br>(0.12)    | 0.14<br>(0.08)       | 0.05<br>(0.11)    | 0.16*<br>(0.08)      |
| Worry about<br>family<br>conflict                         | 0.13<br>(0.15)    | 0.04<br>(0.09)       | 0.06<br>(0.15)    | 0.04<br>(0.09)       | 0.27*<br>(0.15)   | 0.17*<br>(0.09)      | 0.25*<br>(0.15)   | 0.18*<br>(0.09)      |
| Worries<br>about<br>financial<br>hardship and<br>job loss | 0.43**<br>(0.14)  | 0.19*<br>(0.09)      | 0.46**<br>(0.14)  | 0.17*<br>(0.09)      | 0.26*<br>(0.15)   | 0.21**<br>(0.08)     | 0.32*<br>(0.16)   | 0.21**<br>(0.09)     |
| PM <sub>2.5</sub> and noise exposures                     |                   |                      |                   |                      |                   |                      |                   |                      |
| PM <sub>2.5</sub>                                         | -                 | -                    | 0.05<br>(0.12)    | 0.19*<br>(0.08)      | -                 | -                    | 0.09<br>(0.12)    | 0.15*<br>(0.08)      |
| Daytime<br>noise                                          | -                 | -                    | -0.01<br>(0.11)   | 0.06<br>(0.09)       | -                 | -                    | -0.25*<br>(0.11)  | 0.12<br>(0.09)       |
| Nighttime<br>noise                                        | -                 | -                    | -0.06<br>(0.12)   | 0.05<br>(0.09)       | -                 | -                    | 0.02<br>(0.11)    | 0.03<br>(0.08)       |

Notes: \*\* denotes  $p < 0.01$ ; \* denotes  $p < 0.05$ . All models control participants' socio-demographic features, which include age, gender, education, employment, marital status, household income, residence neighborhoods, housing type, homeownership, and working place.

Table S10. Results of the linear regression models for participants' house type. (N = 217).

| Variables                                     | Depression              |                            |                         |                            | Stress                  |                            |                         |                            |
|-----------------------------------------------|-------------------------|----------------------------|-------------------------|----------------------------|-------------------------|----------------------------|-------------------------|----------------------------|
|                                               | Residential-based       |                            | Mobility-based          |                            | Residential-based       |                            | Mobility-based          |                            |
|                                               | Social house<br>(N=144) | Non-social house<br>(N=73) |
|                                               | Coef.<br>(SE)           | Coef.<br>(SE)              | Coef.<br>(SE)           | Coef.<br>(SE)              | Coef.<br>(SE)           | Coef.<br>(SE)              | Coef.<br>(SE)           | Coef.<br>(SE)              |
| Greenspace                                    |                         |                            |                         |                            |                         |                            |                         |                            |
| Open Space and Recreational land              | 0.02<br>(0.08)          | 0.17<br>(0.13)             | -0.01<br>(0.09)         | -0.03<br>(0.13)            | 0.20*<br>(0.08)         | 0.06 (0.12)                | 0.18*<br>(0.08)         | 0.02<br>(0.13)             |
| Greenspace                                    | -0.02<br>(0.09)         | -0.13<br>(0.11)            | -0.05<br>(0.08)         | -0.12<br>(0.12)            | -0.06<br>(0.08)         | -0.01<br>(0.12)            | -0.07<br>(0.08)         | -0.18<br>(0.12)            |
| COVID-19 risk and worries                     |                         |                            |                         |                            |                         |                            |                         |                            |
| Perceived COVID-19 risk                       | 0.10<br>(0.08)          | 0.27*<br>(0.12)            | 0.22**<br>(0.08)        | 0.27*<br>(0.12)            | 0.08<br>(0.08)          | 0.10<br>(0.13)             | 0.15*<br>(0.08)         | 0.24*<br>(0.13)            |
| Worry about family conflict                   | 0.09<br>(0.09)          | 0.19<br>(0.12)             | 0.07<br>(0.09)          | 0.21<br>(0.13)             | 0.26**<br>(0.08)        | 0.18<br>(0.15)             | 0.24**<br>(0.09)        | 0.12<br>(0.15)             |
| Worries about financial hardship and job loss | 0.20*<br>(0.09)         | 0.21<br>(0.14)             | 0.24**<br>(0.09)        | 0.20<br>(0.15)             | 0.21*<br>(0.09)         | 0.13<br>(0.15)             | 0.12<br>(0.08)          | 0.11<br>(0.16)             |
| PM <sub>2.5</sub> and noise exposures         |                         |                            |                         |                            |                         |                            |                         |                            |
| PM <sub>2.5</sub>                             | -                       | -                          | 0.13*<br>(0.07)         | 0.12<br>(0.12)             | -                       | -                          | 0.09<br>(0.07)          | 0.03<br>(0.13)             |
| Daytime noise                                 | -                       | -                          | -0.01<br>(0.08)         | -0.04<br>(0.13)            | -                       | -                          | 0.09<br>(0.08)          | -0.11<br>(0.12)            |
| Nighttime noise                               | -                       | -                          | 0.06<br>(0.08)          | 0.06<br>(0.12)             | -                       | -                          | 0.02<br>(0.08)          | 0.01<br>(0.13)             |

Notes: \*\* denotes  $p < 0.01$ ; \* denotes  $p < 0.05$ . All models control participants' socio-demographic features, which include age, gender, education, employment, marital status, household income, residence neighborhoods, housing type, homeownership, and working place.

**Table S11.** Results of the linear regression models for participants' household monthly income. (N = 217).

| Variables                                     | Depression            |                       |                       |                       | Stress                |                       |                       |                       |
|-----------------------------------------------|-----------------------|-----------------------|-----------------------|-----------------------|-----------------------|-----------------------|-----------------------|-----------------------|
|                                               | Residential-based     |                       | Mobility-based        |                       | Residential-based     |                       | Mobility-based        |                       |
|                                               | High income<br>(N=56) | Low income<br>(N=161) |
|                                               | Coef.<br>(SE)         |
| Greenspace                                    |                       |                       |                       |                       |                       |                       |                       |                       |
| Open Space and Recreational land              | 0.18<br>(0.15)        | 0.02<br>(0.08)        | 0.30<br>(0.16)        | -0.02<br>(0.09)       | 0.23*<br>(0.15)       | 0.12 (0.08)           | 0.35*<br>(0.18)       | 0.15*<br>(0.08)       |
| Greenspace                                    | -0.04<br>(0.20)       | 0.01<br>(0.08)        | -0.30*<br>(0.15)      | -0.07<br>(0.08)       | -0.07<br>(0.18)       | 0.03 (0.09)           | -0.36*<br>(0.17)      | -0.08<br>(0.08)       |
| COVID-19 risk and worries                     |                       |                       |                       |                       |                       |                       |                       |                       |
| Perceived COVID-19 risk                       | 0.11<br>(0.13)        | 0.17*<br>(0.08)       | 0.01<br>(0.12)        | 0.30***<br>(0.08)     | 0.02<br>(0.16)        | 0.16*<br>(0.07)       | 0.12<br>(0.15)        | 0.21**<br>(0.08)      |
| Worry about family conflict                   | 0.07<br>(0.13)        | 0.15*<br>(0.09)       | 0.03<br>(0.13)        | 0.14<br>(0.09)        | 0.23*<br>(0.16)       | 0.25**<br>(0.08)      | 0.03<br>(0.15)        | 0.27**<br>(0.09)      |
| Worries about financial hardship and job loss | 0.51**<br>(0.13)      | 0.15*<br>(0.10)       | 0.50**<br>(0.12)      | 0.16*<br>(0.09)       | 0.22*<br>(0.17)       | 0.14<br>(0.09)        | 0.51**<br>(0.18)      | 0.12<br>(0.09)        |
| PM <sub>2.5</sub> and noise exposures         |                       |                       |                       |                       |                       |                       |                       |                       |
| PM <sub>2.5</sub>                             | -                     | -                     | 0.31*<br>(0.14)       | 0.04<br>(0.07)        | -                     | -                     | 0.11<br>(0.15)        | 0.11<br>(0.07)        |
| Daytime noise                                 | -                     | -                     | -0.07<br>(0.12)       | 0.03<br>(0.08)        | -                     | -                     | -0.01<br>(0.14)       | 0.05<br>(0.08)        |
| Nighttime noise                               | -                     | -                     | 0.09<br>(0.13)        | 0.01<br>(0.08)        | -                     | -                     | 0.15<br>(0.15)        | -0.05<br>(0.08)       |

Notes: \*\*\* denotes  $p < 0.001$ ; \*\* denotes  $p < 0.01$ ; \* denotes  $p < 0.05$ . All models control participants' socio-demographic features, which include age, gender, education, employment, marital status, household income, residence neighborhoods, housing type, homeownership, and working place.
